# Supplementary material for: Variance of Gene Expression Identifies Altered Network Constraints in Neurological Disease
Source: PLOS journal article supplement (doi:10.1371/journal.pgen.1002207), 2011-08-11

## Supplementary Tutorial 1: Testing for Differences in Degree Distributions

For each donor group, the set of high and low expression variance genes are each associated with their own connectivity or degree distribution within a signalling network. The degree distribution characterizes the proportion of genes with the same degree or connectivity.

For example, the high and low variance degree distributions for the control group for the MAPK signalling network were:

### Degree distribution for High Variance Genes in Control Group

|            |          |          |          |          |          |          |          |          |          |          |          |
|------------|----------|----------|----------|----------|----------|----------|----------|----------|----------|----------|----------|
| Degree     | 0        | 1        | 2        | 3        | 4        | 5        | 6        | 8        | 9        | 10       | 11       |
| % of Genes | 0.169811 | 0.075472 | 0.264151 | 0.113208 | 0.056604 | 0.056604 | 0.056604 | 0.018868 | 0.037736 | 0.018868 | 0.037736 |

|            |          |          |          |          |
|------------|----------|----------|----------|----------|
| Degree     | 13       | 15       | 16       | 17       |
| % of Genes | 0.037736 | 0.018868 | 0.018868 | 0.018868 |

### Degree distribution for Low Variance Genes in the Control Group

|            |          |          |          |          |          |          |          |          |          |          |          |
|------------|----------|----------|----------|----------|----------|----------|----------|----------|----------|----------|----------|
| Degree     | 1        | 2        | 3        | 4        | 5        | 6        | 8        | 9        | 10       | 11       | 13       |
| % of Genes | 0.078947 | 0.052632 | 0.131579 | 0.052632 | 0.052632 | 0.026316 | 0.131579 | 0.052632 | 0.052632 | 0.026316 | 0.026316 |

|            |          |          |          |          |          |          |          |          |          |          |
|------------|----------|----------|----------|----------|----------|----------|----------|----------|----------|----------|
| Degree     | 15       | 17       | 18       | 19       | 20       | 21       | 23       | 26       | 29       | 30       |
| % of Genes | 0.026316 | 0.026316 | 0.026316 | 0.026316 | 0.078947 | 0.026316 | 0.026316 | 0.026316 | 0.026316 | 0.026316 |

Since the two distributions span slightly different ranges of degree number, we focus only on testing the deviation between the two distributions for the genes with the same degree.

Under the null hypothesis that both distributions were generated from the same parameters, we designate the high variance group as the observed distribution, and use this to calculate the expected distribution for the low variance group.

For the MAPK network, there were 38 low variance genes for the control group, so the predicted or expected distribution is:

|                 |          |          |          |          |          |          |          |          |          |          |          |          |          |
|-----------------|----------|----------|----------|----------|----------|----------|----------|----------|----------|----------|----------|----------|----------|
| Degree          | 1        | 2        | 3        | 4        | 5        | 6        | 8        | 9        | 10       | 11       | 13       | 15       | 17       |
| Number of Genes | 2.867925 | 10.03774 | 4.301887 | 2.150943 | 2.150943 | 2.150943 | 0.716981 | 1.433962 | 0.716981 | 1.433962 | 1.433962 | 0.716981 | 0.716981 |

|                 |   |   |   |   |   |   |   |   |    |    |    |    |    |
|-----------------|---|---|---|---|---|---|---|---|----|----|----|----|----|
| Degree          | 1 | 2 | 3 | 4 | 5 | 6 | 8 | 9 | 10 | 11 | 13 | 15 | 17 |
| Number of Genes | 3 | 2 | 5 | 2 | 2 | 1 | 5 | 2 | 2  | 1  | 1  | 1  | 1  |

The test statistic measuring the deviation between distributions is given as:

$$X = \sum_{j=0}^{14} \frac{(Expected_j - Observed_j)^2}{Expected_j} \sim \chi_9^2$$

and follows a Chi-squared distribution with the number of different degrees – 1; so for this example there are 9 degrees of freedom. The P-value associated with this test statistic is 0.000351; the difference between the degree distributions for the high and low variance genes is highly significant.

Control Group

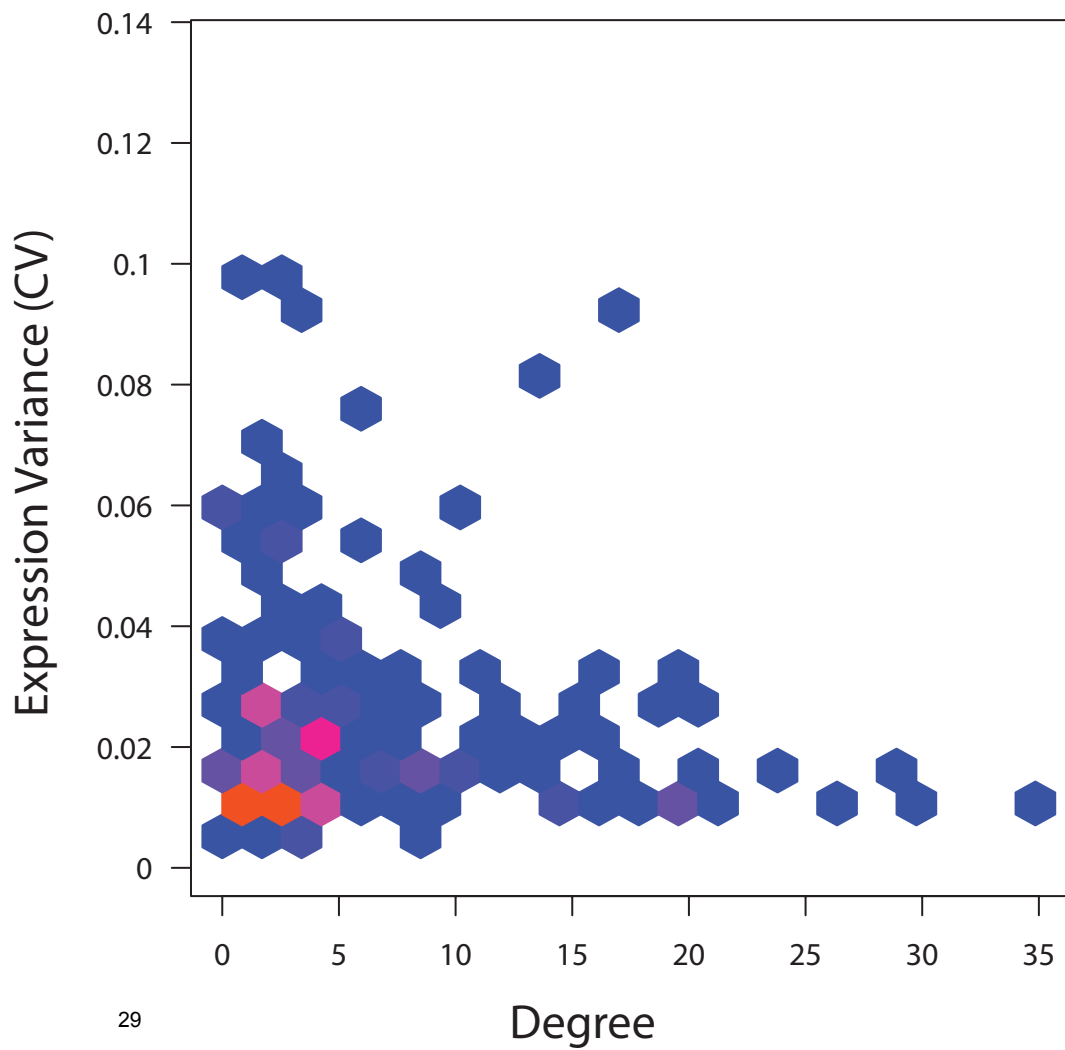

Parkinson's Disease Group

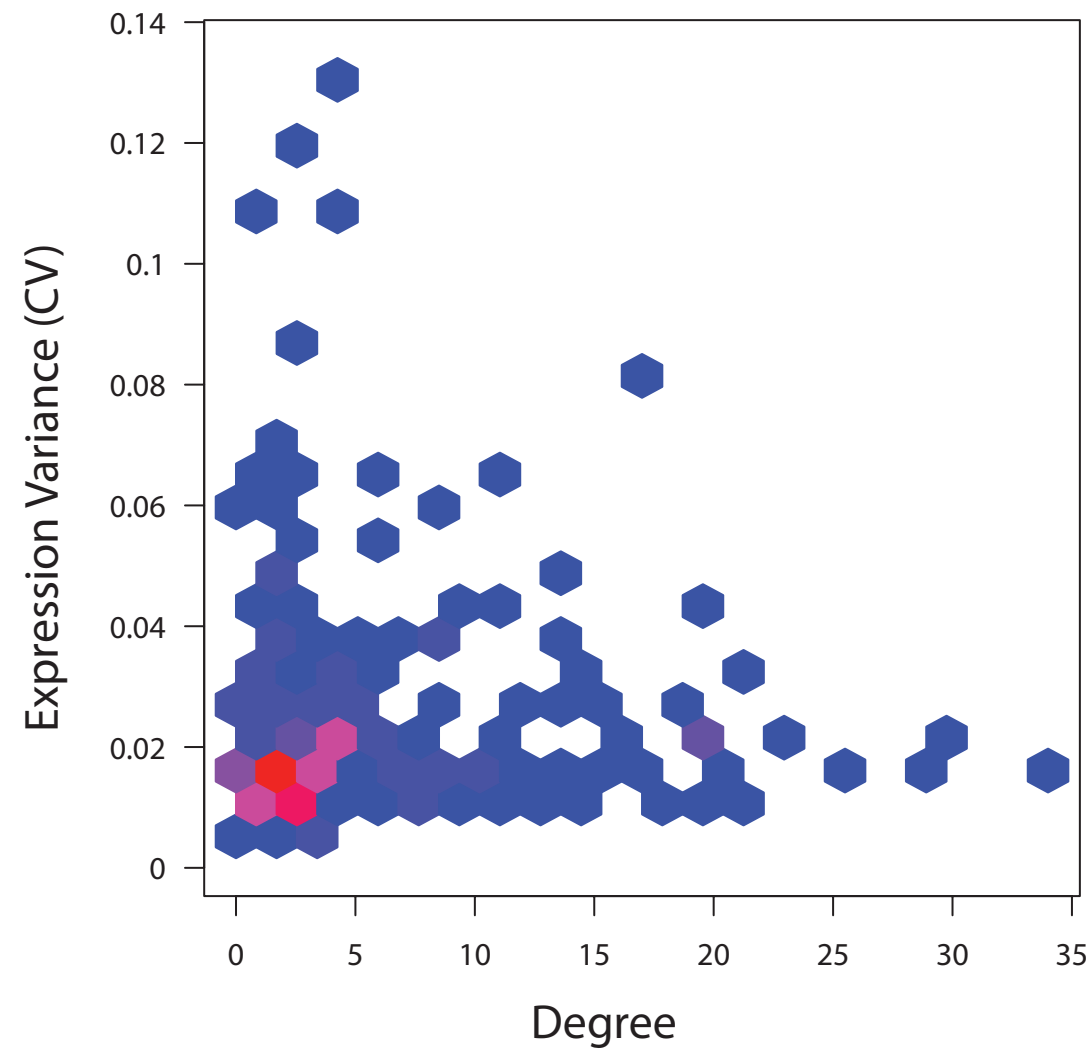

Schizophrenia Group

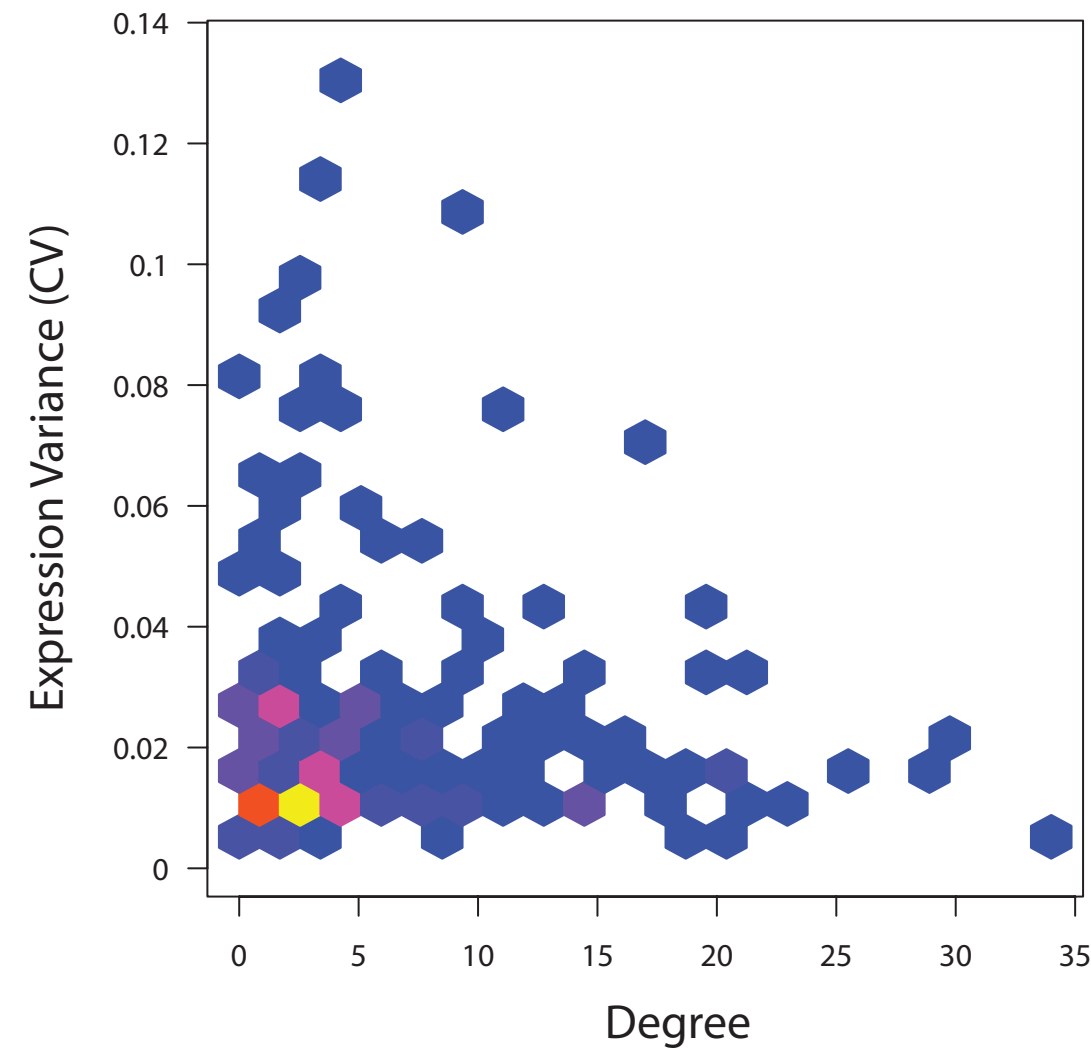

Counts

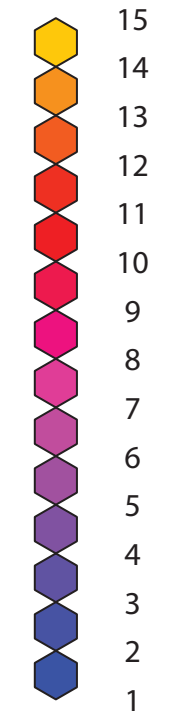

Supplement: S6 (10.1371/journal.pgen.1002207.s006) [file journal.pgen.1002207.s006]
